# Supplementary material
Source: PubMed Central journal article supplement (PMC3878873)
Supplement: NIHMS478627-supplement-ds001.pdf [file NIHMS478627-supplement-ds001.pdf]

## SUPPLEMENTAL MATERIAL

### METHODS

Prior to linkage analysis, the variance component methodology implemented in SOLAR v.4.3.1 was used to obtain heritability ( $h^2$ ) estimates for each of the endophenotypes to verify our previously published report of significant heritabilities for these endophenotypes and to evaluate potential covariates for linkage (1, 2). This maximum likelihood method assumes a multivariate normal distribution of phenotypes in a pedigree and can accommodate a defined set of covariates. The null hypothesis of no heritability ( $h^2=0$ ) is tested by comparing a “full” model, which assumes that some fraction of the phenotypic variation is explained by genetic factors, to a “reduced” model, which assumes that no variation is explained by genes, using likelihood ratio tests. A correction was made for ascertainment bias, since the families were recruited through the identification of a proband with schizophrenia and are thus not representative of the general population. The type of correction scheme implemented in SOLAR conditions on the trait values of the probands, assuming that they are non-random (3). Because this method does not depend on the specification of a particular threshold value for ascertainment for which the correction will be based, it is more flexible than other methods and appropriate for our analyses. Although variance component methods are relatively robust to departures from normality within families,(3-5) the distribution of values for each endophenotype was analyzed prior to analysis to eliminate large departures. Outliers, defined as trait values greater than three standard deviations from the mean, were removed to improve the distribution of the endophenotypes. Two such subjects were removed for PPI, and five were removed for P50. Since ABF, S-M, and EMO deviated from normality following covariate adjustment with residual kurtosis values  $>0.8$  and required normalization prior to analysis. The distributions of

all other endophenotypes approximated normality, and normalization of these endophenotypes produced consistent results.

Several factors that were likely to affect the endophenotypes (i.e., age, sex, and site of assessment) were explored as potential covariates. Covariates explaining a significant portion of the trait heritability ( $P < 0.05$ ) were included in the analysis of each endophenotype as follows: age at interview was included for all but P50; sex was included for PPI, CVLT-II, FMEM, SPA, and EMO; and site of assessment was included for the DS-CPT and CVLT-II. IQ and level of education were not included as covariates in these analyses because, despite the fact that they may be associated with many of the endophenotypes in question, they are also impacted by schizophrenia. Schizophrenia diagnosis was also not included as a covariate, since that would effectively remove the part of the gene-endophenotype linkage that is specifically related to schizophrenia.

Multidimensional scaling, as implemented in PLINK (6), was used to assess the degree of population stratification in this sample and to validate the self-reported subject ancestries. These results confirmed that subjects of European ancestry formed the largest and most genetically homogenous group, encompassing 89% of the sample. The remaining 11% of subjects showed varying degrees of Hispanic, Asian, and African ancestry. Since linkage analyses are family-based, we would not expect the presence of genetic admixture to result in an increased type I (false-positive) error rate, although there may be an artificial inflation of the type II (false negative) error rate, potentially leading to undetected true linkages. Nonetheless, we evaluated the possible effect of genetic admixture on the endophenotype heritabilities through inclusion of the first two principal components from the multidimensional scaling analysis as covariates. Further adjustment for genetic admixture had little effect on the magnitude of the genetic signal (data not shown); therefore, only the minimally adjusted models were interpreted further.

Bivariate environmental ( $\rho_E$ ) and genetic ( $\rho_G$ ) correlation estimates were also computed using SOLAR to verify our previous findings, as shown in Table S1 (1, 7). The genetic correlation between two endophenotypes is the component of the overall correlation that is due to pleiotropy (i.e., the influence of a gene or set of genes on both endophenotypes simultaneously), which is obtained from the kinship information in the pedigree. The environmental correlation between two endophenotypes is the component of the correlation due to environmental factors that influence both endophenotypes, which is obtained from the individual-specific error.

## REFERENCES

1. Greenwood TA, Braff DL, Light GA, Cadenhead KS, Calkins ME, Dobie DJ, Freedman R, Green MF, Gur RE, Gur RC, Mintz J, Nuechterlein KH, Olincy A, Radant AD, Seidman LJ, Siever LJ, Silverman JM, Stone WS, Swerdlow NR, Tsuang DW, Tsuang MT, Turetsky BI, Schork NJ: Initial heritability analyses of endophenotypic measures for schizophrenia: the consortium on the genetics of schizophrenia. *Arch Gen Psychiatry* 2007; 64:1242-1250
2. Almasy L, Blangero J: Multipoint quantitative-trait linkage analysis in general pedigrees. *Am J Hum Genet* 1998; 62:1198-1211
3. Beaty TH, Liang KY: Robust inference for variance components models in families ascertained through probands: I. Conditioning on proband's phenotype. *Genet Epidemiol* 1987; 4:203-210
4. Allison DB, Neale MC, Zannolli R, Schork NJ, Amos CI, Blangero J: Testing the robustness of the likelihood-ratio test in a variance-component quantitative-trait loci-mapping procedure. *Am J Hum Genet* 1999; 65:531-544

5. Amos CI, Zhu DK, Boerwinkle E: Assessing genetic linkage and association with robust components of variance approaches. *Ann Hum Genet* 1996; 60:143-160
6. Purcell S, Neale B, Todd-Brown K, Thomas L, Ferreira MA, Bender D, Maller J, Sklar P, de Bakker PI, Daly MJ, Sham PC: PLINK: A Tool Set for Whole-Genome Association and Population-Based Linkage Analyses. *Am J Hum Genet* 2007; 81:559-575
7. Almasy L, Dyer TD, Blangero J: Bivariate quantitative trait linkage analysis: pleiotropy versus co-incident linkages. *Genet Epidemiol* 1997; 14:953-958

**Table S1** – Genetic and environmental correlation estimates observed between the 12 endophenotypes.

|        | PPI | P50           | AS                   | DS-CPT               | CVLT                 | LNS                  | ABF                  | FMEM                 | SMEM                 | SPA                  | S-M                  | EMO                  |
|--------|-----|---------------|----------------------|----------------------|----------------------|----------------------|----------------------|----------------------|----------------------|----------------------|----------------------|----------------------|
| PPI    | /   | 0.22<br>±0.11 | ns                   | 0.22<br>±0.08        | ns                   | 0.22<br>±0.08        | ns                   | ns                   | ns                   | ns                   | ns                   | ns                   |
| P50    | ns  | /             | ns                   | 0.19<br>±0.09        | ns                   | 0.22<br>±0.08        | ns                   | ns                   | ns                   | ns                   | ns                   | ns                   |
| AS     | ns  | ns            | /                    | <b>0.30</b><br>±0.06 | 0.22<br>±0.07        | 0.16<br>±0.07        | ns                   | <b>0.25</b><br>±0.07 | 0.18<br>±0.07        | 0.19<br>±0.08        | <b>0.28</b><br>±0.07 | <b>0.27</b><br>±0.06 |
| DS-CPT | ns  | ns            | 0.44<br>±0.12        | /                    | 0.18<br>±0.06        | <b>0.28</b><br>±0.06 | 0.15<br>±0.07        | <b>0.23</b><br>±0.06 | ns                   | ns                   | <b>0.27</b><br>±0.07 | <b>0.22</b><br>±0.06 |
| CVLT   | ns  | ns            | ns                   | ns                   | /                    | ns                   | 0.20<br>±0.06        | <b>0.26</b><br>±0.06 | 0.15<br>±0.07        | 0.21<br>±0.07        | 0.18<br>±0.07        | <b>0.31</b><br>±0.06 |
| LNS    | ns  | ns            | 0.31<br>±0.14        | ns                   | <b>0.31</b><br>±0.06 | /                    | ns                   | ns                   | ns                   | <b>0.26</b><br>±0.07 | 0.16<br>±0.07        | <b>0.23</b><br>±0.06 |
| ABF    | ns  | ns            | 0.43<br>±0.19        | 0.55<br>±0.18        | 0.50<br>±0.20        | 0.54<br>±0.18        | /                    | <b>0.21</b><br>±0.06 | ns                   | 0.22<br>±0.07        | <b>0.22</b><br>±0.06 | 0.19<br>±0.06        |
| FMEM   | ns  | ns            | ns                   | ns                   | ns                   | ns                   | ns                   | /                    | <b>0.24</b><br>±0.06 | 0.22<br>±0.07        | <b>0.33</b><br>±0.06 | <b>0.31</b><br>±0.05 |
| SMEM   | ns  | ns            | 0.40<br>±0.13        | 0.35<br>±0.14        | <b>0.63</b><br>±0.17 | 0.30<br>±0.15        | <b>0.68</b><br>±0.18 | 0.42<br>±0.14        | /                    | 0.21<br>±0.07        | ns                   | 0.14<br>±0.06        |
| SPA    | ns  | ns            | <b>0.54</b><br>±0.10 | <b>0.51</b><br>±0.12 | 0.33<br>±0.14        | 0.29<br>±0.12        | <b>0.65</b><br>±0.16 | ns                   | 0.33<br>±0.12        | /                    | 0.16<br>±0.08        | 0.21<br>±0.07        |
| S-M    | ns  | ns            | ns                   | ns                   | ns                   | ns                   | ns                   | ns                   | 0.30<br>±0.15        | 0.27<br>±0.12        | /                    | <b>0.28</b><br>±0.06 |
| EMO    | ns  | ns            | ns                   | ns                   | ns                   | ns                   | ns                   | 0.64<br>±0.15        | 0.43<br>±0.18        | <b>0.61</b><br>±0.15 | ns                   | /                    |

Bivariate genetic correlations ( $\rho_G$ ) and their standard errors are indicated below the diagonal with environmental correlations ( $\rho_E$ ) indicated above the diagonal. Correlations with  $p < 0.0008$  remain significant after correction for multiple testing and are indicated in bold. All nonsignificant correlations ( $p > 0.05$ ) are indicated as “ns”.

**Table S2** – Summary of all linkage peaks with LOD>1.0 identified by SOLAR and MERLIN.

| Chrom   | Endophenotype | <u>SOLAR</u>  |       |             | <u>MERLIN</u> |      |
|---------|---------------|---------------|-------|-------------|---------------|------|
|         |               | Position (cM) | LOD   | Empirical P | Position (cM) | LOD  |
| 1p36    | LNS           | 25            | 1.6   | 0.004       | 27            | 1.4  |
| 1p36    | EMO           | 38            | 3.5*  | <0.0001     | 37            | 2.5* |
| 1p32    | SMEM          | 77            | 1.3   | 0.009       |               |      |
| 1p31    | EMO           | 102           | 1.6   | 0.006       |               |      |
| 1q31    | FMEM          |               |       |             | 191           | 1.1  |
| 1q32    | DS-CPT        |               |       |             | 204           | 1.3  |
| 1q41    | AS            | 224           | 1.7   | 0.007       | 223           | 1.6  |
| 1q43    | AS            | 246           | 1.8   | 0.006       |               |      |
| 2p25    | SPA           |               |       |             | 18            | 2.5* |
| 2q24    | S-M           | 164           | 1.4   | 0.008       | 168           | 2.8* |
| 2q32    | S-M           | 188           | 1.5   | 0.006       | 190           | 2.7* |
| 2q35    | ABF           | 221           | 1.2   | 0.007       | 216           | 1.3  |
| 3p26    | DS-CPT        | 15            | 1.7   | 0.006       | 14            | 1.7  |
| 3p24    | S-M           |               |       |             | 43            | 1.4  |
| 3p24    | FMEM          |               |       |             | 44            | 1.2  |
| 3p22    | CVLT-II       |               |       |             | 63            | 1.3  |
| 3p14    | AS            | 87            | 4.0** | <0.0001     | 88            | 2.4* |
| 3q26    | PPI           | 175           | 1.4   | 0.013       | 177           | 1.9  |
| 4p16    | SMEM          |               |       |             | 9             | 2.1  |
| 4p15    | DS-CPT        |               |       |             | 26            | 1.1  |
| 4p15    | FMEM          | 32            | 1.0   | 0.007       | 26            | 1.8  |
| 4p15    | PPI           |               |       |             | 45            | 1.2  |
| 4p14    | FMEM          |               |       |             | 57            | 1.3  |
| 4q21    | PPI           | 91            | 1.2   | 0.013       |               |      |
| 4q32-33 | ABF           | 159           | 1.5   | 0.003       | 166           | 1.3  |
| 5p15    | PPI           | 0.6           | 2.5*  | 0.0001      | 0.6           | 2.4* |
| 5p15    | CVLT-II       |               |       |             | 34            | 1.5  |
| 5p13    | AS            | 64            | 1.1   | 0.025       | 52            | 1.2  |
| 5q15    | ABF           | 106           | 1.4   | 0.003       | 108           | 1.3  |
| 6p25    | ABF           |               |       |             | 4             | 1.5  |
| 6q21    | CVLT-II       |               |       |             | 114           | 1.8  |
| 6q21    | DS-CPT        | 113           | 1.8   | 0.005       | 115           | 2.2  |
| 6q23    | EMO           | 136           | 1.1   | 0.016       |               |      |
| 6q24    | SMEM          |               |       |             | 149           | 1.4  |
| 7p22    | S-M           |               |       |             | 3             | 1.4  |

|          |         |     |      |        |     |      |
|----------|---------|-----|------|--------|-----|------|
| 7p12     | PPI     | 73  | 1.6  | 0.006  |     |      |
| 7q21     | S-M     |     |      |        | 94  | 1.2  |
| 7q21     | SPA     | 99  | 1.2  | 0.016  | 98  | 1.3  |
| 7q31     | SMEM    | 128 | 1.8  | 0.002  | 127 | 2.2  |
| 7q32     | FMEM    |     |      |        | 135 | 2.1  |
| 7q36     | S-M     |     |      |        | 159 | 1.3  |
| 7q36     | FMEM    | 164 | 1.6  | 0.001  |     |      |
| 7q36     | EMO     | 193 | 1.3  | 0.011  |     |      |
| 8p23     | CVLT    |     |      |        | 9   | 1.4  |
| 8q11     | EMO     | 63  | 1.1  | 0.016  |     |      |
| 8q22     | LNS     |     |      |        | 106 | 1.2  |
| 8q24     | CVLT-II | 153 | 1.1  | 0.008  | 136 | 2.4* |
| 9p24     | LNS     | 14  | 1.7  | 0.004  | 0   | 1.5  |
| 9p23     | PPI     | 27  | 1.1  | 0.016  |     |      |
| 9q31     | S-M     |     |      |        | 106 | 1.2  |
| 9q31     | SPA     | 110 | 1.1  | 0.019  |     |      |
| 9q31     | AS      | 113 | 1.2  | 0.019  | 112 | 1.3  |
| 9q33     | FMEM    | 128 | 1.2  | 0.005  |     |      |
| 9q33     | S-M     |     |      |        | 133 | 1.4  |
| 9q34     | FMEM    |     |      |        | 148 | 1.7  |
| 10q23-24 | P50     | 115 | 1.6  | 0.003  | 119 | 1.5  |
| 10q26    | DS-CPT  | 153 | 1.9  | 0.004  | 155 | 2.4* |
| 10q26    | AS      | 160 | 1.2  | 0.019  | 168 | 1.0  |
| 10q26    | SMEM    | 167 | 1.5  | 0.005  | 168 | 1.3  |
| 10q26    | FMEM    | 168 | 2.2* | 0.0001 | 171 | 2.4* |
| 11p15    | ABF     |     |      |        | 22  | 1.2  |
| 11p15    | LNS     |     |      |        | 27  | 1.2  |
| 11p11-12 | EMO     | 65  | 1.8  | 0.003  | 61  | 1.9  |
| 11q14    | AS      | 85  | 1.6  | 0.009  |     |      |
| 11q21    | CVLT-II |     |      |        | 96  | 1.1  |
| 11q22    | SPA     |     |      |        | 109 | 1.2  |
| 12p13    | ABF     | 2   | 1.2  | 0.006  |     |      |
| 12p13    | S-M     | 14  | 1.6  | 0.005  |     |      |
| 12p12    | CVLT-II | 34  | 1.3  | 0.004  | 32  | 1.5  |
| 12p12    | FMEM    |     |      |        | 34  | 2.8* |
| 12q15    | P50     |     |      |        | 85  | 1.3  |
| 12q21    | AS      | 97  | 1.3  | 0.018  | 99  | 1.2  |
| 12q24    | EMO     | 139 | 1.2  | 0.015  | 129 | 1.6  |
| 13q12    | CVLT-II |     |      |        | 8   | 1.5  |
| 13q13    | DS-CPT  | 32  | 1.6  | 0.006  | 29  | 1.3  |

|          |         |     |      |        |     |      |
|----------|---------|-----|------|--------|-----|------|
| 13q22    | SPA     |     |      |        | 71  | 1.4  |
| 14q23    | LNS     | 65  | 2.0  | 0.003  | 61  | 2.5  |
| 15q13    | SMEM    |     |      |        | 16  | 1.1  |
| 15q14    | ABF     | 28  | 1.1  | 0.010  | 29  | 1.4  |
| 15q14    | DS-CPT  | 37  | 1.3  | 0.012  |     |      |
| 15q21    | PPI     | 44  | 1.2  | 0.014  |     |      |
| 15q26    | DS-CPT  |     |      |        | 125 | 1.0  |
| 16p13    | PPI     | 2   | 1.8  | 0.004  |     |      |
| 16p13    | P50     | 15  | 1.2  | 0.011  | 13  | 1.5  |
| 16p13    | FMEM    |     |      |        | 29  | 1.1  |
| 16q22    | ABF     | 86  | 1.3  | 0.004  | 86  | 1.7  |
| 16q23    | SPA     | 102 | 2.6* | 0.0005 | 105 | 2.5* |
| 17p13    | DS-CPT  | 6   | 1.4  | 0.011  |     |      |
| 17p13    | SMEM    | 8   | 1.3  | 0.009  | 4   | 1.6  |
| 17p13    | FMEM    | 10  | 1.8  | 0.0007 |     |      |
| 17p13    | S-M     | 10  | 1.2  | 0.016  | 16  | 1.7  |
| 17p13    | FMEM    | 28  | 1.6  | 0.001  | 28  | 2.0  |
| 17q11    | FMEM    | 51  | 1.6  | 0.001  |     |      |
| 17q11    | EMO     |     |      |        | 56  | 1.6  |
| 17q12    | ABF     |     |      |        | 58  | 1.4  |
| 17q24    | EMO     | 98  | 1.2  | 0.013  |     |      |
| 18q21-22 | P50     | 76  | 1.1  | 0.016  | 93  | 1.7  |
| 18q22    | DS-CPT  |     |      |        | 102 | 1.6  |
| 19q13    | CVLT-II | 103 | 1.8  | 0.001  | 105 | 1.8  |
| 20p12    | DS-CPT  | 27  | 1.1  | 0.019  | 24  | 1.4  |
| 20q13    | PPI     | 109 | 1.0  | 0.020  | 87  | 1.2  |
| 21q22    | ABF     | 58  | 1.2  | 0.008  |     |      |
| 22q11    | FMEM    |     |      |        | 2   | 1.1  |
| 22q11    | SPA     |     |      |        | 8   | 1.5  |
| 22q12    | DS-CPT  | 24  | 1.5  | 0.008  |     |      |
| 22q12    | S-M     |     |      |        | 43  | 2.0  |
| Xp11     | DS-CPT  |     |      |        | 76  | 2.2* |

Empirical P values from 10,000 simulations are indicated for each SOLAR LOD score >1.0. \*Indicates LOD scores >2.2 meeting criteria for suggestive linkage. \*\*Indicates LOD scores >3.6 meeting criteria for significant linkage
